# Supplementary material for: Thermosensitivity and luminescent properties of new tetraphenylethylene derivatives bearing peripheral oligo(ethylene glycol) chains
Source: Royal Society of Chemistry journal article supplement (doi:10.1039/c3tc31482k), 2013-01-01
Supplement: c3tc31482k.pdf [file c3tc31482k.pdf]

## Electronic Supplementary Information

### Thermosensitivity and luminescent property of new tetraphenylethylene derivatives bearing peripheral oligo(ethylene glycol) chains

Xiuxiu Yin, Fanxing Meng and Liyan Wang\*

State Key Laboratory of Supramolecular Structure and Materials, College of Chemistry, Jilin University,

Changchun 130012, P. R. China

E-mail: [yinxiuxiu@hotmail.com](mailto:yinxiuxiu@hotmail.com); Fax: +86 431 85193421; Tel: +86 431 85168497

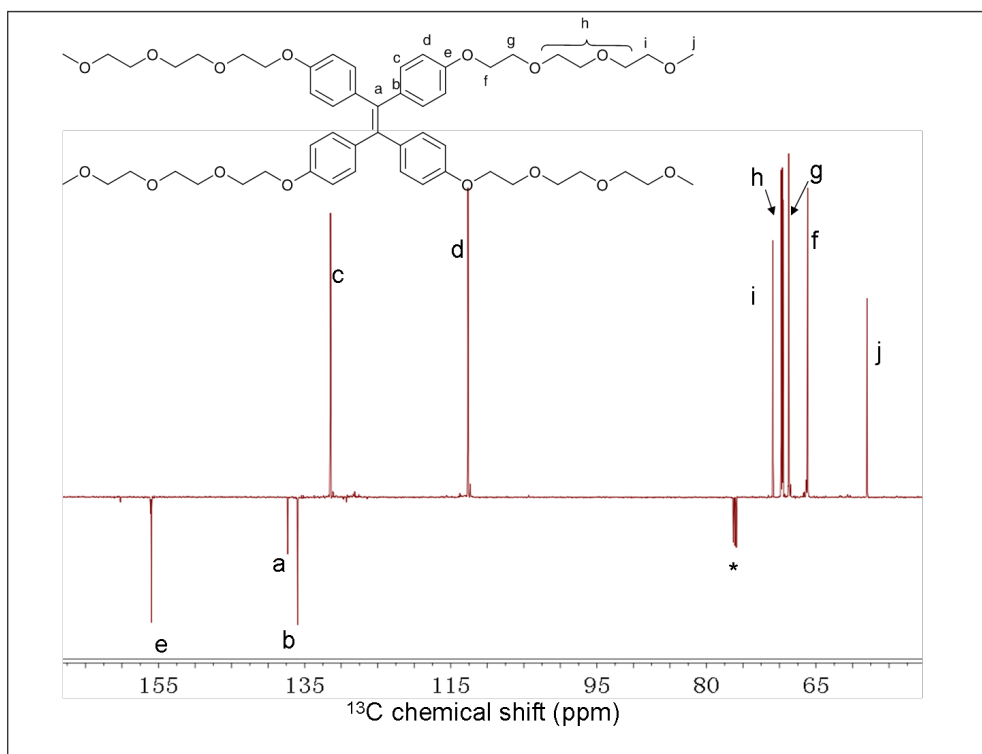

Figure S1.  $^{13}\text{C}$  NMR spectra of  $\text{M}(\text{EO})_3\text{-TPE}$  in  $\text{CDCl}_3$ .

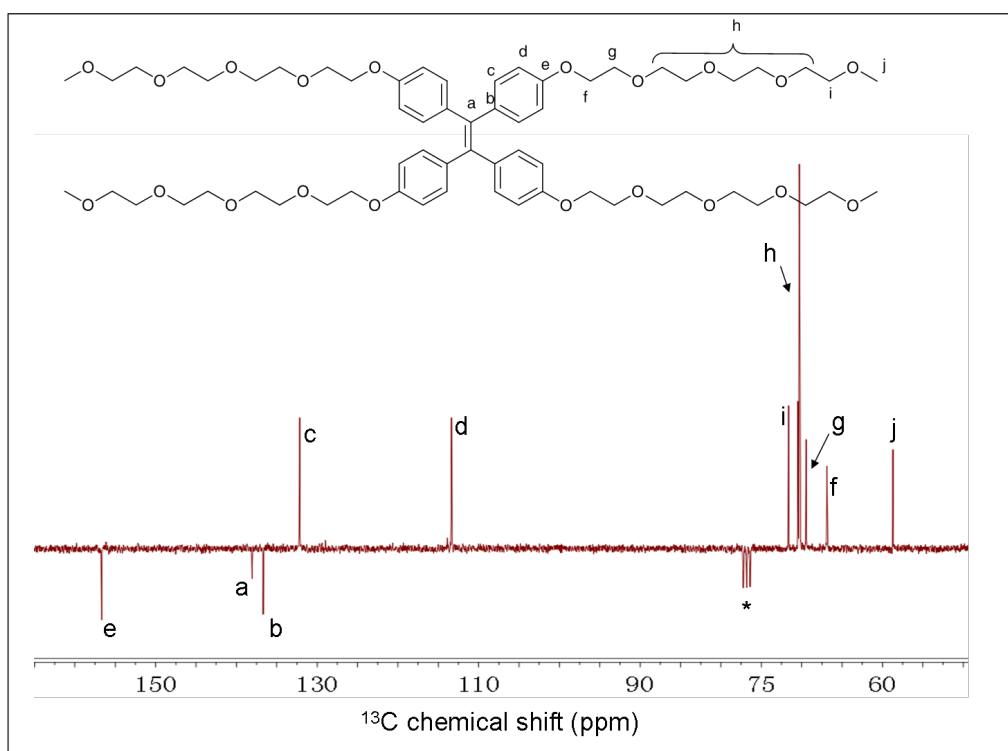

**Figure S2.**  $^{13}\text{C}$  NMR spectra of  $\text{M}(\text{EO})_4\text{-TPE}$  in  $\text{CDCl}_3$ .

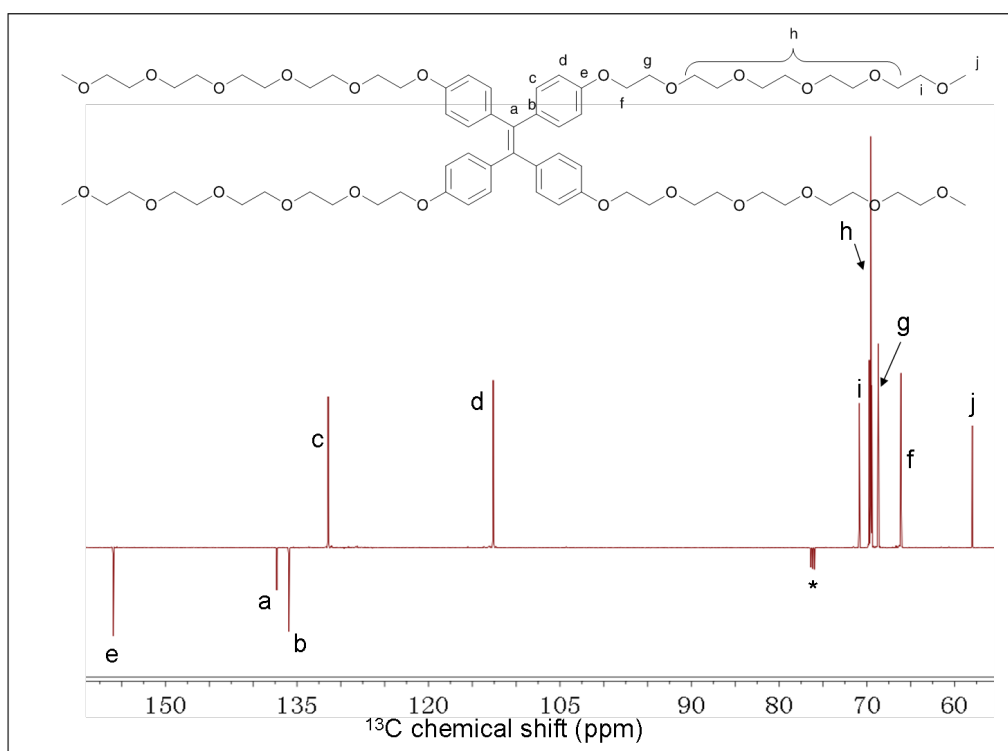

**Figure S3.**  $^{13}\text{C}$  NMR spectra of  $\text{M}(\text{EO})_5\text{-TPE}$  in  $\text{CDCl}_3$ .
